# Supplementary material
Source: publisher figshare collection journal article supplement (https://sage.figshare.com/ndownloader/files/20272632)
Supplement: Supplementary file 1 [file 20272632]

**Supplementary Figure 1:** A) Kaplan-Meier Curve depicting all-cause mortality for intermediate-high-risk versus intermediate-low-risk groups.

**Supplementary Figure 2:** A) Kaplan-Meier Curve depicting all-cause mortality, excluding subjects with known malignancy at baseline. B) Kaplan-Meier curve depicting all-cause mortality for massive, submassive, and low-risk PE, excluding subjects with known malignancy at baseline.

**Supplementary Table 1:** Causes of Death during the short- and long-term time periods after acute PE

Supplementary Figure 1:

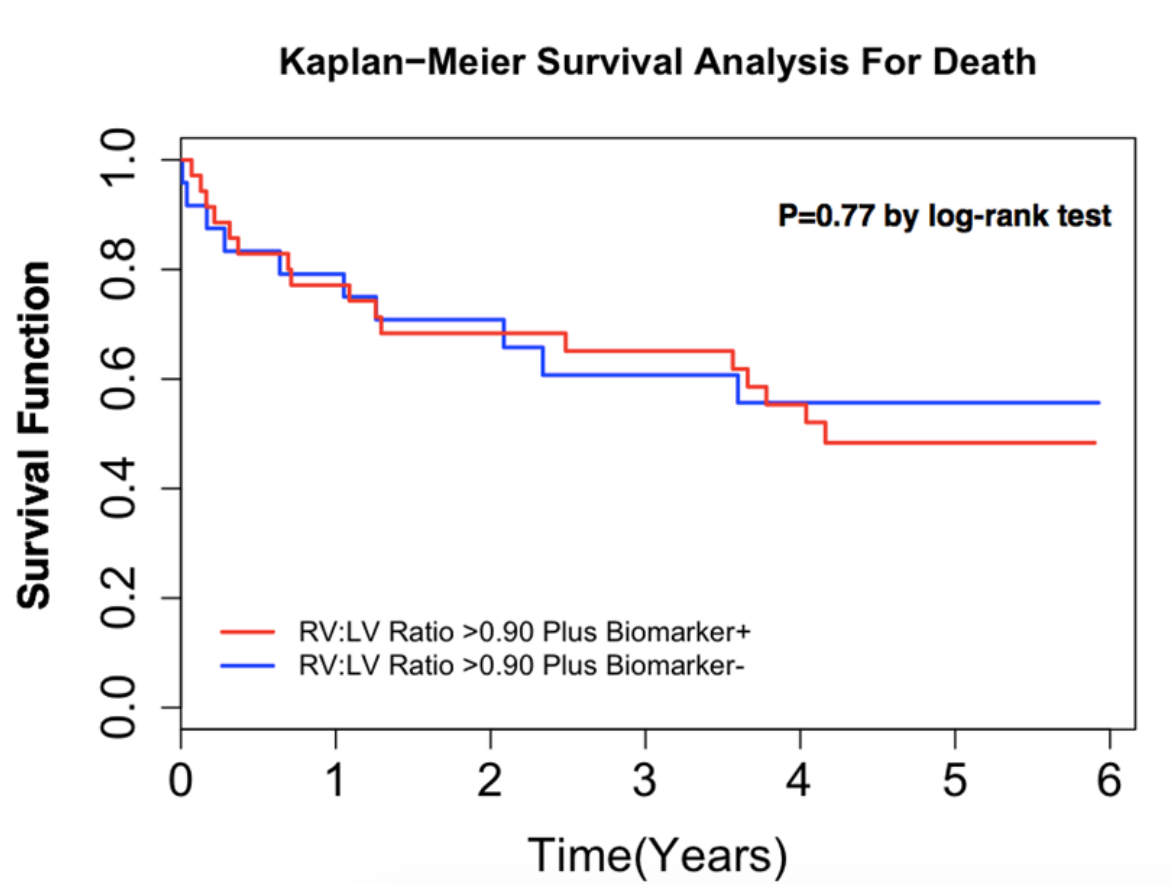

**Supplementary Figure 2A:**

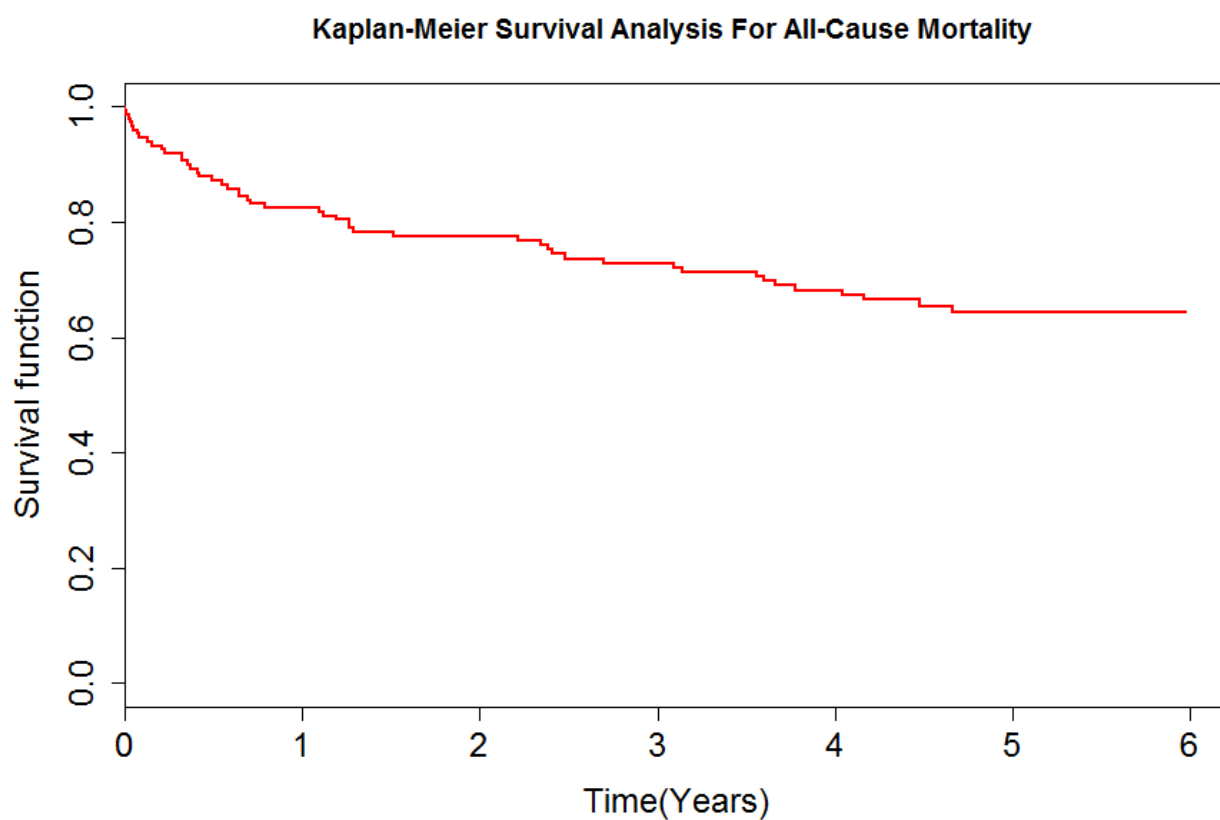

**Supplementary Figure 2B:**

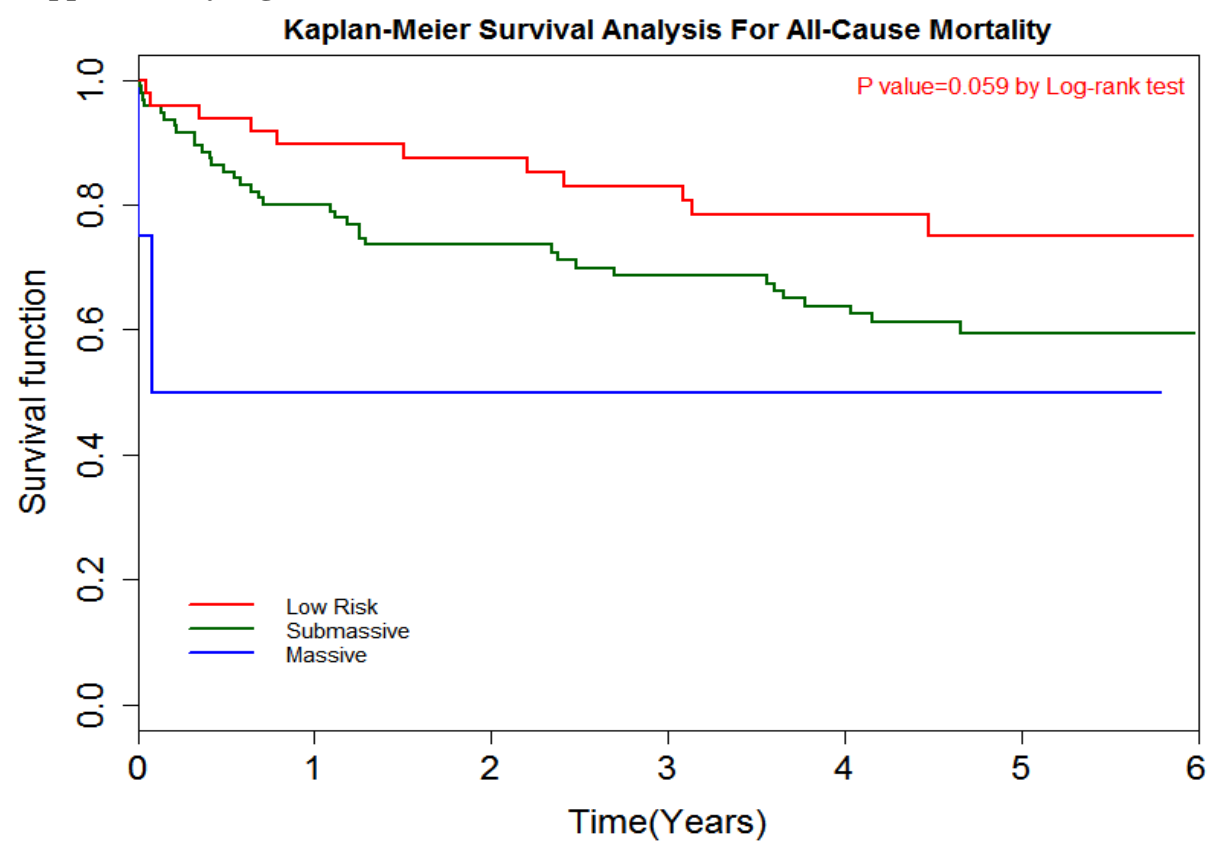

**Supplementary Table 1**

| Cause of death                     | ≤ 30 days | >30 days | Total |
|------------------------------------|-----------|----------|-------|
| Cardiac disease:                   |           |          | 11    |
| Ischemic heart disease (CAD/AMI)   | 1         | 5        | 6     |
| Congestive heart failure           | 1         | 4        | 5     |
| Pulmonary Embolism                 | 4         | 4        | 8     |
| Cerebrovascular disease            | 2         | 3        | 5     |
| Vascular/ ruptured aortic aneurysm | 0         | 1        | 1     |
| Respiratory disease                | 1         | 9        | 10    |
| Infectious disease/Sepsis          | 1         | 4        | 5     |
| Dementia                           | 1         | 4        | 5     |
| Malignancy                         | 3         | 19       | 22    |
| Other                              | 0         | 7        | 7     |
| Total                              | 14        | 60       | 74    |
| Percentage of Total Mortality      | 19%       | 81%      | 100%  |

Abbreviations: CAD, coronary artery disease; AMI, acute myocardial infarctions.
